# Supplementary material for: Pubertal high fat diet: effects on mammary cancer development
Source: PubMed Central journal article supplement (PMC3978633; doi:10.1186/bcr3561), 2013-10-25
Supplement: bcr3561-S3.pdf [file bcr3561-S3.pdf]

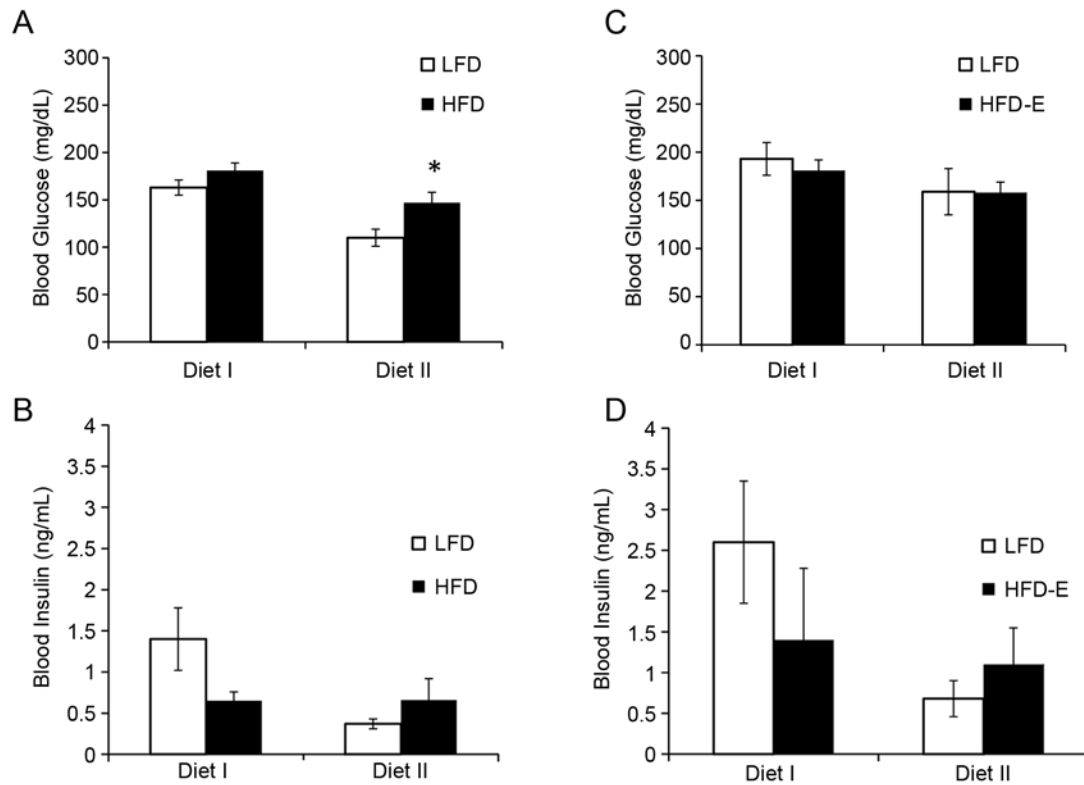

**Figure S2. Comparison of the effects of diets I and II on non-fasting blood levels of glucose and insulin.** BALB/c mice were started on high fat diet (HFD) or low fat diet (LFD) I or II at 3 weeks of age. Blood levels of (A,C) glucose and (B,D) insulin were measured at 10 weeks on diet (A,B) or in tumor-bearing mice (C,D). The bars represent the mean  $\pm$  S.E.M. for samples from 5 animals per diet at 10 weeks on diet, 6 early developing tumors on HFD (HFD-E), and 5 LFD tumor-bearing mice. \*,  $p=0.02$  HFD II blood glucose level higher than LFD II at 10 weeks on diet.
