# Supplementary material for: Pubertal high fat diet: effects on mammary cancer development
Source: PubMed Central journal article supplement (PMC3978633; doi:10.1186/bcr3561), 2013-10-25
Supplement: bcr3561-S4.pdf [file bcr3561-S4.pdf]

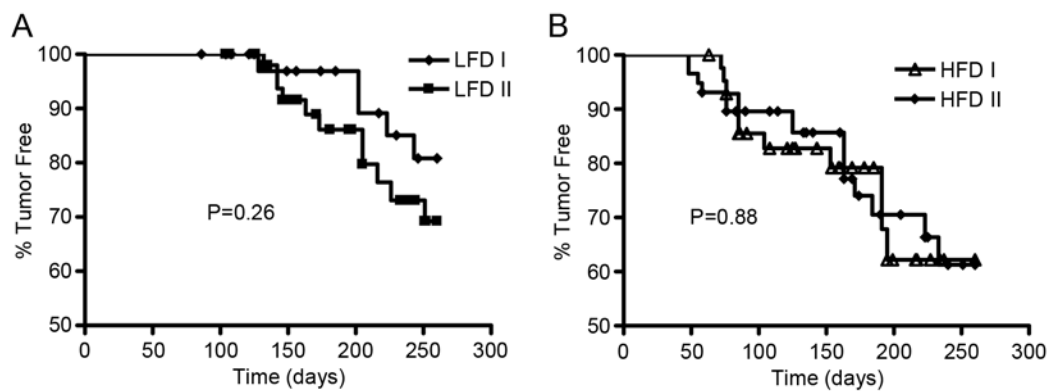

**Figure S3. Comparison of the effects of diets I (A) and II (B) on tumor development.** Tumor development was monitored starting after the last 7,12-dimethylbenz[a]anthracene (DMBA) treatment. Kaplan-Meier plots show no significant differences in latency of tumors developing on (A) low fat diet (LFD) I vs. LFD II or (B) high fat diet (HFD) I vs. HFD II. Development of tumors in LFD-fed mice was observed only after 18 weeks post-DMBA treatment on either diet I or II. Time = days post last DMBA treatment.
