# Supplementary material for: Pubertal high fat diet: effects on mammary cancer development
Source: PubMed Central journal article supplement (PMC3978633; doi:10.1186/bcr3561), 2013-10-25
Supplement: bcr3561-S5.pdf [file bcr3561-S5.pdf]

Supplemental Table 2. Tumor Incidence

| Treatment | Tumor Incidence (N) <sup>a</sup> |
|-----------|----------------------------------|
| LFD I     | 13.5% (37)                       |
| HFD I     | 26.5% (41)                       |
| LFD II    | 16% (50)                         |
| HFD II    | 25.9% (54)                       |

Mice were treated with diet starting at 3 weeks of age, treated with DMBA, and followed for tumor development until 45 weeks of age.

<sup>a</sup> N = number of mice per group
