# Supplementary material for: Pubertal high fat diet: effects on mammary cancer development
Source: PubMed Central journal article supplement (PMC3978633; doi:10.1186/bcr3561), 2013-10-25
Supplement: bcr3561-S6.pdf [file bcr3561-S6.pdf]

### Experimental Design

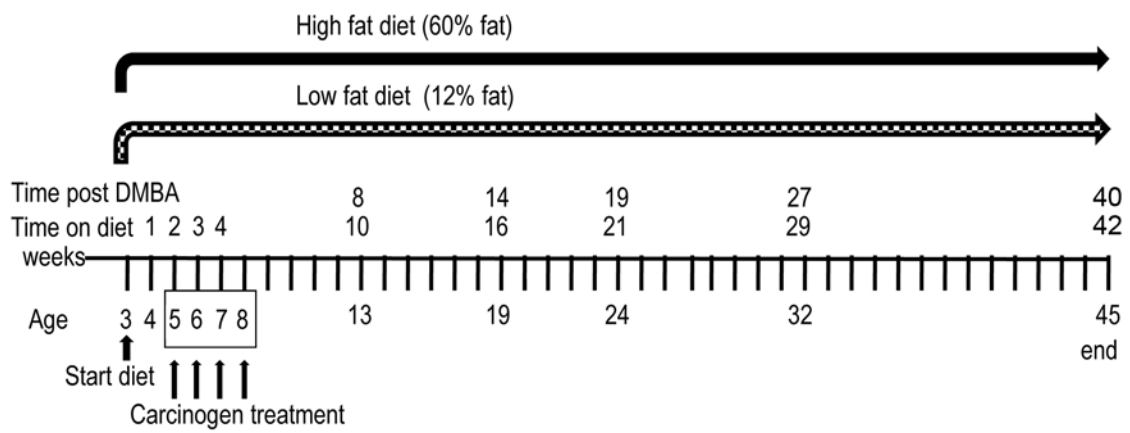

**Figure S4. Diagram of experimental design.**
