# Supplementary material for: Pubertal high fat diet: effects on mammary cancer development
Source: PubMed Central journal article supplement (PMC3978633; doi:10.1186/bcr3561), 2013-10-25
Supplement: bcr3561-S8.pdf [file bcr3561-S8.pdf]

Supplemental Table 4. 4 weeks on diet qPCR Ingenuity Pathway Analysis

1) Significant Gene List (5):

BDNF  
 FZD5  
 LEFTY2  
 LIF  
 TNFSF11/RANKL

2) Top Canonical Pathways

| Ingenuity Canonical Pathways                                                   | B-H Adjusted p-value | Ratio | Molecules        |
|--------------------------------------------------------------------------------|----------------------|-------|------------------|
| Human Embryonic Stem Cell Pluripotency                                         | 1.44E-04             | 3/156 | BDNF,FZD5,LEFTY2 |
| Mouse Embryonic Stem Cell Pluripotency                                         | 4.07E-03             | 2/99  | LIF,FZD5         |
| Role of NANOG in Mammalian Embryonic Stem Cell Pluripotency                    | 4.07E-03             | 2/114 | LIF,FZD5         |
| Role of Osteoblasts, Osteoclasts and Chondrocytes in Rheumatoid Arthritis      | 1.20E-02             | 2/238 | TNFSF11,FZD5     |
| Role of Macrophages, Fibroblasts and Endothelial Cells in Rheumatoid Arthritis | 1.83E-02             | 2/332 | TNFSF11,FZD5     |
| Axonal Guidance Signaling                                                      | 3.03E-02             | 2/469 | BDNF,FZD5        |

3) Function Table

| Category                                       | Functions Annotation                        | B-H Adjusted p-value | Molecules                           | Number of Molecules |
|------------------------------------------------|---------------------------------------------|----------------------|-------------------------------------|---------------------|
| <b>4wk qPCR IPA Function Table</b>             |                                             |                      |                                     |                     |
| Cardiovascular System Development and Function | <b>development of cardiovascular system</b> | <b>4.06E-04</b>      | <b>BDNF,FZD5,LEFTY2,LIF,TNFSF11</b> | <b>5</b>            |
|                                                | angiogenesis                                | 1.19E-03             | BDNF,FZD5,LIF,TNFSF11               | 4                   |
|                                                | development of blood vessel                 | 1.60E-03             | BDNF,FZD5,LIF,TNFSF11               | 4                   |
|                                                | proliferation of endothelial cells          | 1.86E-03             | BDNF,FZD5,TNFSF11                   | 3                   |
|                                                | morphology of cardiovascular system         | 3.09E-03             | FZD5,LEFTY2,LIF                     | 3                   |
| Cell Death and Survival*                       | cell viability of tumor cell lines          | 3.36E-03             | BDNF,LIF,TNFSF11                    | 3                   |
| Cell Morphology*                               | size of connective tissue cells             | 4.66E-04             | BDNF,LIF,TNFSF11                    | 3                   |
| Cell Signaling                                 | release of Ca <sup>2+</sup>                 | 1.19E-03             | BDNF,LIF,TNFSF11                    | 3                   |
| Cell-mediated Immune Response                  | differentiation of T lymphocytes            | 2.03E-03             | FZD5,LIF,TNFSF11                    | 3                   |
| Cell-To-Cell Signaling and Interaction         | stimulation of cells                        | 1.86E-03             | BDNF,LIF,TNFSF11                    | 3                   |
| Cellular Development*                          | <b>maturation of cells</b>                  | <b>4.06E-04</b>      | <b>BDNF,FZD5,LIF,TNFSF11</b>        | <b>4</b>            |
|                                                | proliferation of embryonic                  | 1.53E-03             | BDNF,LIF,TNFSF11                    | 3                   |

|                                               |                                          |                 |                         |  |          |
|-----------------------------------------------|------------------------------------------|-----------------|-------------------------|--|----------|
|                                               | cells                                    |                 |                         |  |          |
|                                               | proliferation of endothelial cells       | 1.86E-03        | BDNF,FZD5,TNFSF11       |  | 3        |
|                                               | proliferation of muscle cells            | 2.03E-03        | BDNF,LIF,TNFSF11        |  | 3        |
|                                               | differentiation of T lymphocytes         | 2.03E-03        | FZD5,LIF,TNFSF11        |  | 3        |
|                                               | differentiation of tumor cell lines      | 2.03E-03        | BDNF,LIF,TNFSF11        |  | 3        |
|                                               | differentiation of cells                 | 4.29E-03        | BDNF,FZD5,LIF,TNFSF11   |  | 4        |
| Cellular Function and Maintenance*            | <b>maintenance of cells</b>              | <b>4.06E-04</b> | <b>BDNF,LIF,TNFSF11</b> |  | <b>3</b> |
|                                               | differentiation of T lymphocytes         | 2.03E-03        | FZD5,LIF,TNFSF11        |  | 3        |
| Cellular Growth and Proliferation*            | generation of cells                      | 1.53E-03        | BDNF,LIF,TNFSF11        |  | 3        |
|                                               | proliferation of embryonic cells         | 1.53E-03        | BDNF,LIF,TNFSF11        |  | 3        |
|                                               | proliferation of endothelial cells       | 1.86E-03        | BDNF,FZD5,TNFSF11       |  | 3        |
|                                               | stimulation of cells                     | 1.86E-03        | BDNF,LIF,TNFSF11        |  | 3        |
|                                               | proliferation of muscle cells            | 2.03E-03        | BDNF,LIF,TNFSF11        |  | 3        |
|                                               | formation of cells                       | 2.03E-03        | BDNF,LIF,TNFSF11        |  | 3        |
| Cellular Movement                             | chemotaxis of cells                      | 2.47E-03        | BDNF,LIF,TNFSF11        |  | 3        |
| Connective Tissue Disorders                   | rheumatoid arthritis                     | 3.47E-03        | BDNF,FZD5,TNFSF11       |  | 3        |
| Developmental Disorder                        | Growth Failure                           | 3.00E-03        | BDNF,LIF,TNFSF11        |  | 3        |
| Digestive System Development and Function     | morphology of digestive system           | 8.93E-04        | BDNF,LEFTY2,LIF,TNFSF11 |  | 4        |
| DNA Replication, Recombination, and Repair    | synthesis of DNA                         | 2.03E-03        | BDNF,LIF,TNFSF11        |  | 3        |
| Embryonic Development                         | proliferation of embryonic cells         | 1.53E-03        | BDNF,LIF,TNFSF11        |  | 3        |
|                                               | development of body axis                 | 3.00E-03        | FZD5,LEFTY2,LIF         |  | 3        |
| Gene Expression                               | transcription of RNA                     | 3.83E-03        | BDNF,FZD5,LIF,TNFSF11   |  | 4        |
| Hematological System Development and Function | quantity of antigen presenting cells     | 1.58E-03        | BDNF,LIF,TNFSF11        |  | 3        |
|                                               | differentiation of T lymphocytes         | 2.03E-03        | FZD5,LIF,TNFSF11        |  | 3        |
| Hematopoiesis                                 | differentiation of T lymphocytes         | 2.03E-03        | FZD5,LIF,TNFSF11        |  | 3        |
| Immunological Disease                         | rheumatoid arthritis                     | 3.47E-03        | BDNF,FZD5,TNFSF11       |  | 3        |
| Inflammatory Disease                          | rheumatoid arthritis                     | 3.47E-03        | BDNF,FZD5,TNFSF11       |  | 3        |
| Lymphoid Tissue Structure and Development     | differentiation of T lymphocytes         | 2.03E-03        | FZD5,LIF,TNFSF11        |  | 3        |
|                                               | morphology of lymphatic system component | 2.25E-03        | LEFTY2,LIF,TNFSF11      |  | 3        |
| Molecular Transport                           | release of Ca <sup>2+</sup>              | 1.19E-03        | BDNF,LIF,TNFSF11        |  | 3        |
| Organismal Development                        | development of blood vessel              | 1.60E-03        | BDNF,FZD5,LIF,TNFSF11   |  | 4        |
|                                               | proliferation of endothelial cells       | 1.86E-03        | BDNF,FZD5,TNFSF11       |  | 3        |
|                                               | development of body axis                 | 3.00E-03        | FZD5,LEFTY2,LIF         |  | 3        |
|                                               | size of body                             | 5.13E-03        | BDNF,LIF,TNFSF11        |  | 3        |

|                                                       |                                      |                 |                                     |          |
|-------------------------------------------------------|--------------------------------------|-----------------|-------------------------------------|----------|
| Organismal Injury and Abnormalities                   | Bleeding                             | 2.03E-03        | BDNF,FZD5,LIF                       | 3        |
| Organismal Survival                                   | <b>organismal death</b>              | <b>2.03E-03</b> | <b>BDNF,FZD5,LEFTY2,LIF,TNFSF11</b> | <b>5</b> |
|                                                       | survival of organism                 | 3.00E-03        | BDNF,FZD5,LIF                       | 3        |
| Skeletal and Muscular Disorders                       | rheumatoid arthritis                 | 3.47E-03        | BDNF,FZD5,TNFSF11                   | 3        |
| Skeletal and Muscular System Development and Function | proliferation of muscle cells        | 2.03E-03        | BDNF,LIF,TNFSF11                    | 3        |
|                                                       | morphology of skeletal system        | 2.47E-03        | LEFTY2,LIF,TNFSF11                  | 3        |
| Small Molecule Biochemistry                           | release of Ca <sup>2+</sup>          | 1.19E-03        | BDNF,LIF,TNFSF11                    | 3        |
| Tissue Development                                    | generation of cells                  | 1.53E-03        | BDNF,LIF,TNFSF11                    | 3        |
|                                                       | proliferation of endothelial cells   | 1.86E-03        | BDNF,FZD5,TNFSF11                   | 3        |
| Tissue Morphology                                     | quantity of antigen presenting cells | 1.58E-03        | BDNF,LIF,TNFSF11                    | 3        |
| Vitamin and Mineral Metabolism                        | release of Ca <sup>2+</sup>          | 1.19E-03        | BDNF,LIF,TNFSF11                    | 3        |

\*IPA Top Molecular and Cellular Functions
