# Supplementary material for: Pubertal high fat diet: effects on mammary cancer development
Source: PubMed Central journal article supplement (PMC3978633; doi:10.1186/bcr3561), 2013-10-25
Supplement: bcr3561-S9.pdf [file bcr3561-S9.pdf]

Supplemental Table 5. 10 weeks on diet qPCR Ingenuity Pathway Analysis

1) Significant Gene List (24):

|        |       |
|--------|-------|
| BMP2   | IL1A  |
| BMP3   | IL1B  |
| CCL1   | IL2   |
| CCL17  | IL2RB |
| CCL19  | IL7   |
| CCL20  | LTA   |
| CCL22  | NODAL |
| CXCL12 | PGF   |
| CXCR2  | TGFA  |
| FGF10  | TGFB1 |
| GDF10  | VEGFA |
| GDF5   | XCR1  |

2) Top Canonical Pathways

| Ingenuity Canonical Pathways                                                          | B-H Adjusted p-value | Ratio | Molecules                                    |
|---------------------------------------------------------------------------------------|----------------------|-------|----------------------------------------------|
| <b>Granulocyte Adhesion and Diapedesis</b>                                            | 5.66E-09             | 8/166 | IL1A,CXCR2,CCL17,CCL20,IL1B,CCL22,CCL19,CCL1 |
| <b>Agranulocyte Adhesion and Diapedesis</b>                                           | 5.66E-09             | 8/176 | IL1A,CXCR2,CCL17,CCL20,IL1B,CCL22,CCL19,CCL1 |
| <b>Hepatic Fibrosis / Hepatic Stellate Cell Activation</b>                            | 1.55E-06             | 6/140 | VEGFA,IL1A,TGFB1,TGFA,IL1B,PGF               |
| <b>Altered T Cell and B Cell Signaling in Rheumatoid Arthritis</b>                    | 3.24E-06             | 5/86  | IL1A,IL2,TGFB1,LTA,IL1B                      |
| <b>Role of Macrophages, Fibroblasts and Endothelial Cells in Rheumatoid Arthritis</b> | 3.32E-06             | 7/311 | VEGFA,IL1A,TGFB1,LTA,IL1B,IL7,PGF            |

|                                                                           |          |       |                               |
|---------------------------------------------------------------------------|----------|-------|-------------------------------|
| Role of Osteoblasts, Osteoclasts and Chondrocytes in Rheumatoid Arthritis | 1.12E-05 | 6/225 | IL1A,TGFB1,BMP3,BMP2,IL1B,IL7 |
| Role of Cytokines in Mediating Communication between Immune Cells         | 1.62E-05 | 4/52  | IL1A,IL2,TGFB1,IL1B           |
| NF- $\kappa$ B Signaling                                                  | 5.11E-05 | 5/169 | IL1A,LTA,BMP2,TGFA,IL1B       |
| Factors Promoting Cardiogenesis in Vertebrates                            | 1E-04    | 4/91  | NODAL,TGFB1,BMP3,BMP2         |
| Pancreatic Adenocarcinoma Signaling                                       | 1.98E-04 | 4/115 | VEGFA,TGFB1,TGFA,PGF          |
| Graft-versus-Host Disease Signaling                                       | 3.58E-04 | 3/46  | IL1A,IL2,IL1B                 |
| Hematopoiesis from Pluripotent Stem Cells                                 | 3.58E-04 | 3/55  | IL1A,IL2,IL7                  |
| Human Embryonic Stem Cell Pluripotency                                    | 3.61E-04 | 4/149 | NODAL,TGFB1,BMP3,BMP2         |
| Role of JAK1 and JAK3 in $\gamma$ c Cytokine Signaling                    | 7.81E-04 | 3/63  | IL2,IL7,IL2RB                 |
| Renal Cell Carcinoma Signaling                                            | 1.04E-03 | 3/71  | VEGFA,TGFB1,TGFA              |
| Hematopoiesis from Multipotent Stem Cells                                 | 1.04E-03 | 2/12  | IL2,IL7                       |
| TGF- $\beta$ Signaling                                                    | 1.6E-03  | 3/89  | NODAL,TGFB1,BMP2              |
| Communication between Innate and Adaptive Immune Cells                    | 1.6E-03  | 3/93  | IL1A,IL2,IL1B                 |

|                                                                                                    |          |       |                  |
|----------------------------------------------------------------------------------------------------|----------|-------|------------------|
| Bladder Cancer Signaling                                                                           | 1.68E-03 | 3/89  | VEGFA,FGF10,PGF  |
| Crosstalk between Dendritic Cells and Natural Killer Cells                                         | 1.76E-03 | 3/91  | IL2,LTA,IL2RB    |
| Differential Regulation of Cytokine Production in Intestinal Epithelial Cells by IL-17A and IL-17F | 2.79E-03 | 2/23  | IL1A,IL1B        |
| Type I Diabetes Mellitus Signaling                                                                 | 2.79E-03 | 3/113 | IL2,LTA,IL1B     |
| Antiproliferative Role of TOB in T Cell Signaling                                                  | 3.14E-03 | 2/26  | IL2,TGFB1        |
| IL-6 Signaling                                                                                     | 3.14E-03 | 3/112 | VEGFA,IL1A,IL1B  |
| p38 MAPK Signaling                                                                                 | 3.14E-03 | 3/116 | IL1A,TGFB1,IL1B  |
| Atherosclerosis Signaling                                                                          | 3.26E-03 | 3/131 | IL1A,TGFB1,IL1B  |
| Aryl Hydrocarbon Receptor Signaling                                                                | 4.23E-03 | 3/141 | IL1A,TGFB1,IL1B  |
| Inhibition of Angiogenesis by TSP1                                                                 | 4.26E-03 | 2/32  | VEGFA,TGFB1      |
| Role of Hypercytokinemia/hyperchemokemia in the Pathogenesis of Influenza                          | 6.74E-03 | 2/41  | IL1A,IL1B        |
| RAR Activation                                                                                     | 7.45E-03 | 3/175 | VEGFA,TGFB1,BMP2 |
| Dendritic Cell Maturation                                                                          | 7.45E-03 | 3/192 | IL1A,LTA,IL1B    |
| ILK Signaling                                                                                      | 8.38E-03 | 3/185 | VEGFA,BMP2,PGF   |

|                                                                              |          |       |                     |
|------------------------------------------------------------------------------|----------|-------|---------------------|
| Clathrin-mediated Endocytosis Signaling                                      | 8.38E-03 | 3/191 | VEGFA,FGF10,PGF     |
| IL-8 Signaling                                                               | 8.38E-03 | 3/192 | VEGFA,CXCR2,PGF     |
| IL-2 Signaling                                                               | 9.28E-03 | 2/56  | IL2,IL2RB           |
| Axonal Guidance Signaling                                                    | 1.05E-02 | 4/457 | VEGFA,BMP3,BMP2,PGF |
| Systemic Lupus Erythematosus Signaling                                       | 1.12E-02 | 3/231 | IL1A,IL2,IL1B       |
| T Helper Cell Differentiation                                                | 1.35E-02 | 2/69  | IL2,TGFB1           |
| IL-10 Signaling                                                              | 1.36E-02 | 2/72  | IL1A,IL1B           |
| Basal Cell Carcinoma Signaling                                               | 1.37E-02 | 2/72  | BMP3,BMP2           |
| Colorectal Cancer Metastasis Signaling                                       | 1.37E-02 | 3/244 | VEGFA,TGFB1,PGF     |
| BMP signaling pathway                                                        | 1.49E-02 | 2/78  | BMP3,BMP2           |
| VEGF Family Ligand-Receptor Interactions                                     | 1.53E-02 | 2/78  | VEGFA,PGF           |
| Regulation of IL-2 Expression in Activated and Anergic T Lymphocytes         | 1.57E-02 | 2/84  | IL2,TGFB1           |
| Glucocorticoid Receptor Signaling                                            | 1.66E-02 | 3/277 | IL2,TGFB1,IL1B      |
| FXR/RXR Activation                                                           | 1.74E-02 | 2/84  | IL1A,IL1B           |
| Role of Pattern Recognition Receptors in Recognition of Bacteria and Viruses | 1.9E-02  | 2/95  | IL2,IL1B            |
| VEGF Signaling                                                               | 1.9E-02  | 2/95  | VEGFA,PGF           |
| PPAR Signaling                                                               | 1.9E-02  | 2/100 | IL1A,IL1B           |

|                                                             |          |       |                 |
|-------------------------------------------------------------|----------|-------|-----------------|
| Telomerase Signaling                                        | 2.03E-02 | 2/99  | IL2,IL2RB       |
| Amyotrophic Lateral Sclerosis Signaling                     | 2.03E-02 | 2/100 | VEGFA,PGF       |
| Nitric Oxide Signaling in the Cardiovascular System         | 2.03E-02 | 2/102 | VEGFA,PGF       |
| Cholecystinin/Gastrin-mediated Signaling                    | 2.11E-02 | 2/101 | IL1A,IL1B       |
| HIF1 $\alpha$ Signaling                                     | 2.11E-02 | 2/102 | VEGFA,PGF       |
| iCOS-iCOSL Signaling in T Helper Cells                      | 2.15E-02 | 2/112 | IL2,IL2RB       |
| Role of Tissue Factor in Cancer                             | 2.27E-02 | 2/109 | VEGFA,IL1B      |
| Role of NANOG in Mammalian Embryonic Stem Cell Pluripotency | 2.31E-02 | 2/113 | BMP3,BMP2       |
| Molecular Mechanisms of Cancer                              | 2.62E-02 | 3/362 | TGFB1,BMP3,BMP2 |
| LXR/RXR Activation                                          | 2.68E-02 | 2/126 | IL1A,IL1B       |
| Gai Signaling                                               | 2.68E-02 | 2/128 | CXCR2,XCR1      |
| eNOS Signaling                                              | 2.76E-02 | 2/129 | VEGFA,PGF       |
| Ovarian Cancer Signaling                                    | 3.02E-02 | 2/138 | VEGFA,PGF       |
| Hepatic Cholestasis                                         | 3.14E-02 | 2/141 | IL1A,IL1B       |
| PPAR $\alpha$ /RXR $\alpha$ Activation                      | 4.38E-02 | 2/173 | TGFB1,IL1B      |
| Acute Phase Response Signaling                              | 4.51E-02 | 2/173 | IL1A,IL1B       |
| Ephrin Receptor Signaling                                   | 4.51E-02 | 2/197 | VEGFA,PGF       |
| Regulation of the Epithelial-Mesenchymal Transition Pathway | 4.79E-02 | 2/187 | FGF10,TGFB1     |

|                |          |       |           |
|----------------|----------|-------|-----------|
| mTOR Signaling | 4.87E-02 | 2/189 | VEGFA,PGF |
|----------------|----------|-------|-----------|

### 3) Function Table

| Category                                       | Functions Annotation              | B-H Adjusted p-Value | Molecules                                                                                                       | Number of Molecules |
|------------------------------------------------|-----------------------------------|----------------------|-----------------------------------------------------------------------------------------------------------------|---------------------|
| 10wk qPCR IPA Function Tables                  |                                   |                      |                                                                                                                 |                     |
| <b>Cancer</b>                                  | <b>Cancer</b>                     | <b>2.63E-03</b>      | <b>BMP2,BMP3,CCL17,CCL19,CCL22,CXCR2,FGF10,GDF10,GDF5,IL1A,IL1B,IL2,IL2RB,IL7,LTA,PGF,TGFA,TGFB1,VEGFA,XCR1</b> | <b>20</b>           |
| Cell Death and Survival                        | cell viability                    | 8.92E-06             | BMP2,IL1A,IL1B,IL2,IL2RB,IL7,LTA,TGFA,TGFB1,VEGFA                                                               | 10                  |
|                                                | apoptosis                         | 2.43E-04             | BMP2,FGF10,IL1A,IL1B,IL2,IL2RB,IL7,LTA,TGFA,TGFB1,VEGFA                                                         | 11                  |
|                                                | necrosis                          | 2.56E-04             | BMP2,IL1A,IL1B,IL2,IL2RB,IL7,LTA,PGF,TGFA,TGFB1,VEGFA                                                           | 11                  |
|                                                | cell death                        | 2.83E-04             | BMP2,FGF10,IL1A,IL1B,IL2,IL2RB,IL7,LTA,PGF,TGFA,TGFB1,VEGFA                                                     | 12                  |
| <b>Cell-To-Cell Signaling and Interaction*</b> | <b>signaling of cells</b>         | <b>3.44E-14</b>      | <b>BMP2,BMP3,CCL17,CCL20,CCL22,GDF5,IL1B,IL2,IL2RB,IL7,LTA,PGF</b>                                              | <b>12</b>           |
|                                                | adhesion of immune cells          | 1.64E-13             | CCL17,CCL19,CCL20,CCL22,CXCR2,IL1A,IL1B,IL2,IL7,TGFB1,VEGFA                                                     | 11                  |
|                                                | communication of cells            | 8.22E-13             | BMP2,BMP3,CCL1,CCL17,CCL19,CCL20,CCL22,CXCR2,GDF5,IL1B,IL2,IL2RB,IL7,LTA,PGF,TGFB1,XCR1                         | 17                  |
|                                                | activation of cells               | 3.52E-09             | BMP2,CXCR2,IL1A,IL1B,IL2,IL7,LTA,TGFA,TGFB1,VEGFA                                                               | 10                  |
|                                                | signal transduction               | 1.13E-05             | CCL1,CCL17,CCL20,CCL22,CXCR2,IL1B,IL2RB,LTA,PGF,XCR1                                                            | 10                  |
| Cellular Development*                          | differentiation of cells          | 5.04E-09             | BMP2,BMP3,FGF10,IL1A,IL1B,IL2,IL2RB,IL7,PGF,TGFA,TGFB1,VEGFA                                                    | 12                  |
|                                                | proliferation of tumor cell lines | 1.03E-06             | BMP2,CCL20,CXCR2,FGF10,IL1A,IL1B,IL2,IL2RB,IL7,NODAL,TGFA,TGFB1,VEGFA                                           | 13                  |
| Cellular Function and Maintenance              | cellular homeostasis              | 5.45E-07             | CCL1,CCL19,CCL20,IL1B,IL2,IL2RB,IL7,TGFB1,VEGFA,XCR1                                                            | 10                  |
| Cellular Growth and Proliferation*             | proliferation of cells            | 3.08E-07             | BMP2,CCL19,CCL20,CXCR2,FGF10,GDF5,IL1A,IL1B,IL2,IL2RB,IL7,LTA,NODAL,PGF,TGFA,TGFB1,VEGFA                        | 17                  |
|                                                | proliferation of tumor cell lines | 1.03E-06             | BMP2,CCL20,CXCR2,FGF10,IL1A,IL1B,IL2,IL2RB,IL7,NODAL,TGFA,TGFB1,VEGFA                                           | 13                  |
| Cellular Movement*                             | leukocyte migration               | 2.03E-13             | CCL1,CCL17,CCL19,CCL20,CCL22,CXCR2,IL1A,IL1B,IL2,IL7,PGF,TGFB1,VEGFA                                            | 13                  |
|                                                | migration of cells                | 8.22E-13             | BMP2,CCL1,CCL17,CCL19,CCL20,CCL22,CXCR2,FGF10,IL1A,IL1B,IL2,IL7,LTA,PGF,TGFA,TGFB1,VEGFA                        | 17                  |
|                                                | cell movement of leukocytes       | 1.47E-12             | CCL1,CCL17,CCL19,CCL20,CCL22,CXCR2,IL1A,IL1B,IL2,IL7,TGFB1,VEGFA                                                | 12                  |
|                                                | chemotaxis of cells               | 1.47E-12             | CCL1,CCL17,CCL19,CCL20,CCL22,CXCR2,FGF10,IL1B,IL2,PGF,TGFB1,VEGFA                                               | 12                  |
|                                                | chemotaxis of leukocytes          | 3.21E-11             | CCL1,CCL17,CCL19,CCL20,CCL22,CXCR2,IL1B,IL2,TGFB1,VEGFA                                                         | 10                  |

|                                               |                                   |          |                                                                                |    |
|-----------------------------------------------|-----------------------------------|----------|--------------------------------------------------------------------------------|----|
|                                               | cell movement of phagocytes       | 4.05E-11 | CCL1,CCL19,CCL20,CCL22,CXCR2,IL1A,IL1B,IL2,TGFB1,VEGFA                         | 10 |
|                                               | cell movement of tumor cell lines | 9.18E-09 | BMP2,CCL1,CCL17,CCL19,CCL20,CCL22,FGF10,IL1A,PGF,TGFA,TGFB1,VEGFA              | 12 |
| Connective Tissue Disorders                   | arthritis                         | 6.19E-11 | BMP2,CCL1,CCL17,CCL19,CCL20,CXCR2,GDF5,IL1A,IL1B,IL2,IL2RB,IL7,LTA,TGFB1,VEGFA | 15 |
|                                               | rheumatoid arthritis              | 1.68E-08 | CCL1,CCL17,CCL19,CCL20,CXCR2,IL1B,IL2,IL2RB,IL7,LTA,TGFB1,VEGFA                | 12 |
| Hematological System Development and Function | adhesion of immune cells          | 1.64E-13 | CCL17,CCL19,CCL20,CCL22,CXCR2,IL1A,IL1B,IL2,IL7,TGFB1,VEGFA                    | 11 |
|                                               | cell movement of leukocytes       | 1.47E-12 | CCL1,CCL17,CCL19,CCL20,CCL22,CXCR2,IL1A,IL1B,IL2,IL7,TGFB1,VEGFA               | 12 |
|                                               | chemotaxis of leukocytes          | 3.21E-11 | CCL1,CCL17,CCL19,CCL20,CCL22,CXCR2,IL1B,IL2,TGFB1,VEGFA                        | 10 |
|                                               | cell movement of phagocytes       | 4.05E-11 | CCL1,CCL19,CCL20,CCL22,CXCR2,IL1A,IL1B,IL2,TGFB1,VEGFA                         | 10 |
| Immune Cell Trafficking                       | adhesion of immune cells          | 1.64E-13 | CCL17,CCL19,CCL20,CCL22,CXCR2,IL1A,IL1B,IL2,IL7,TGFB1,VEGFA                    | 11 |
|                                               | leukocyte migration               | 2.03E-13 | CCL1,CCL17,CCL19,CCL20,CCL22,CXCR2,IL1A,IL1B,IL2,IL7,PGF,TGFB1,VEGFA           | 13 |
|                                               | cell movement of leukocytes       | 1.47E-12 | CCL1,CCL17,CCL19,CCL20,CCL22,CXCR2,IL1A,IL1B,IL2,IL7,TGFB1,VEGFA               | 12 |
|                                               | chemotaxis of leukocytes          | 3.21E-11 | CCL1,CCL17,CCL19,CCL20,CCL22,CXCR2,IL1B,IL2,TGFB1,VEGFA                        | 10 |
|                                               | cell movement of phagocytes       | 4.05E-11 | CCL1,CCL19,CCL20,CCL22,CXCR2,IL1A,IL1B,IL2,TGFB1,VEGFA                         | 10 |
| Immunological Disease                         | rheumatoid arthritis              | 1.68E-08 | CCL1,CCL17,CCL19,CCL20,CXCR2,IL1B,IL2,IL2RB,IL7,LTA,TGFB1,VEGFA                | 12 |
| Inflammatory Disease                          | arthritis                         | 6.19E-11 | BMP2,CCL1,CCL17,CCL19,CCL20,CXCR2,GDF5,IL1A,IL1B,IL2,IL2RB,IL7,LTA,TGFB1,VEGFA | 15 |
|                                               | rheumatoid arthritis              | 1.68E-08 | CCL1,CCL17,CCL19,CCL20,CXCR2,IL1B,IL2,IL2RB,IL7,LTA,TGFB1,VEGFA                | 12 |
| Inflammatory Response                         | inflammatory response             | 1.57E-12 | CCL1,CCL17,CCL19,CCL20,CCL22,CXCR2,IL1A,IL1B,IL2,TGFB1,VEGFA,XCR1              | 12 |
|                                               | chemotaxis of leukocytes          | 3.21E-11 | CCL1,CCL17,CCL19,CCL20,CCL22,CXCR2,IL1B,IL2,TGFB1,VEGFA                        | 10 |
|                                               | cell movement of phagocytes       | 4.05E-11 | CCL1,CCL19,CCL20,CCL22,CXCR2,IL1A,IL1B,IL2,TGFB1,VEGFA                         | 10 |
| Skeletal and Muscular Disorders               | arthritis                         | 6.19E-11 | BMP2,CCL1,CCL17,CCL19,CCL20,CXCR2,GDF5,IL1A,IL1B,IL2,IL2RB,IL7,LTA,TGFB1,VEGFA | 15 |
|                                               | rheumatoid arthritis              | 1.68E-08 | CCL1,CCL17,CCL19,CCL20,CXCR2,IL1B,IL2,IL2RB,IL7,LTA,TGFB1,VEGFA                | 12 |
| Tissue Development                            | adhesion of immune cells          | 1.64E-13 | CCL17,CCL19,CCL20,CCL22,CXCR2,IL1A,IL1B,IL2,IL7,TGFB1,VEGFA                    | 11 |

\*IPA Top Molecular and Cellular Functions
