# Supplementary material for: Pubertal high fat diet: effects on mammary cancer development
Source: PubMed Central journal article supplement (PMC3978633; doi:10.1186/bcr3561), 2013-10-25
Supplement: bcr3561-S11.pdf [file bcr3561-S11.pdf]

3 wks MG

10 wks MG

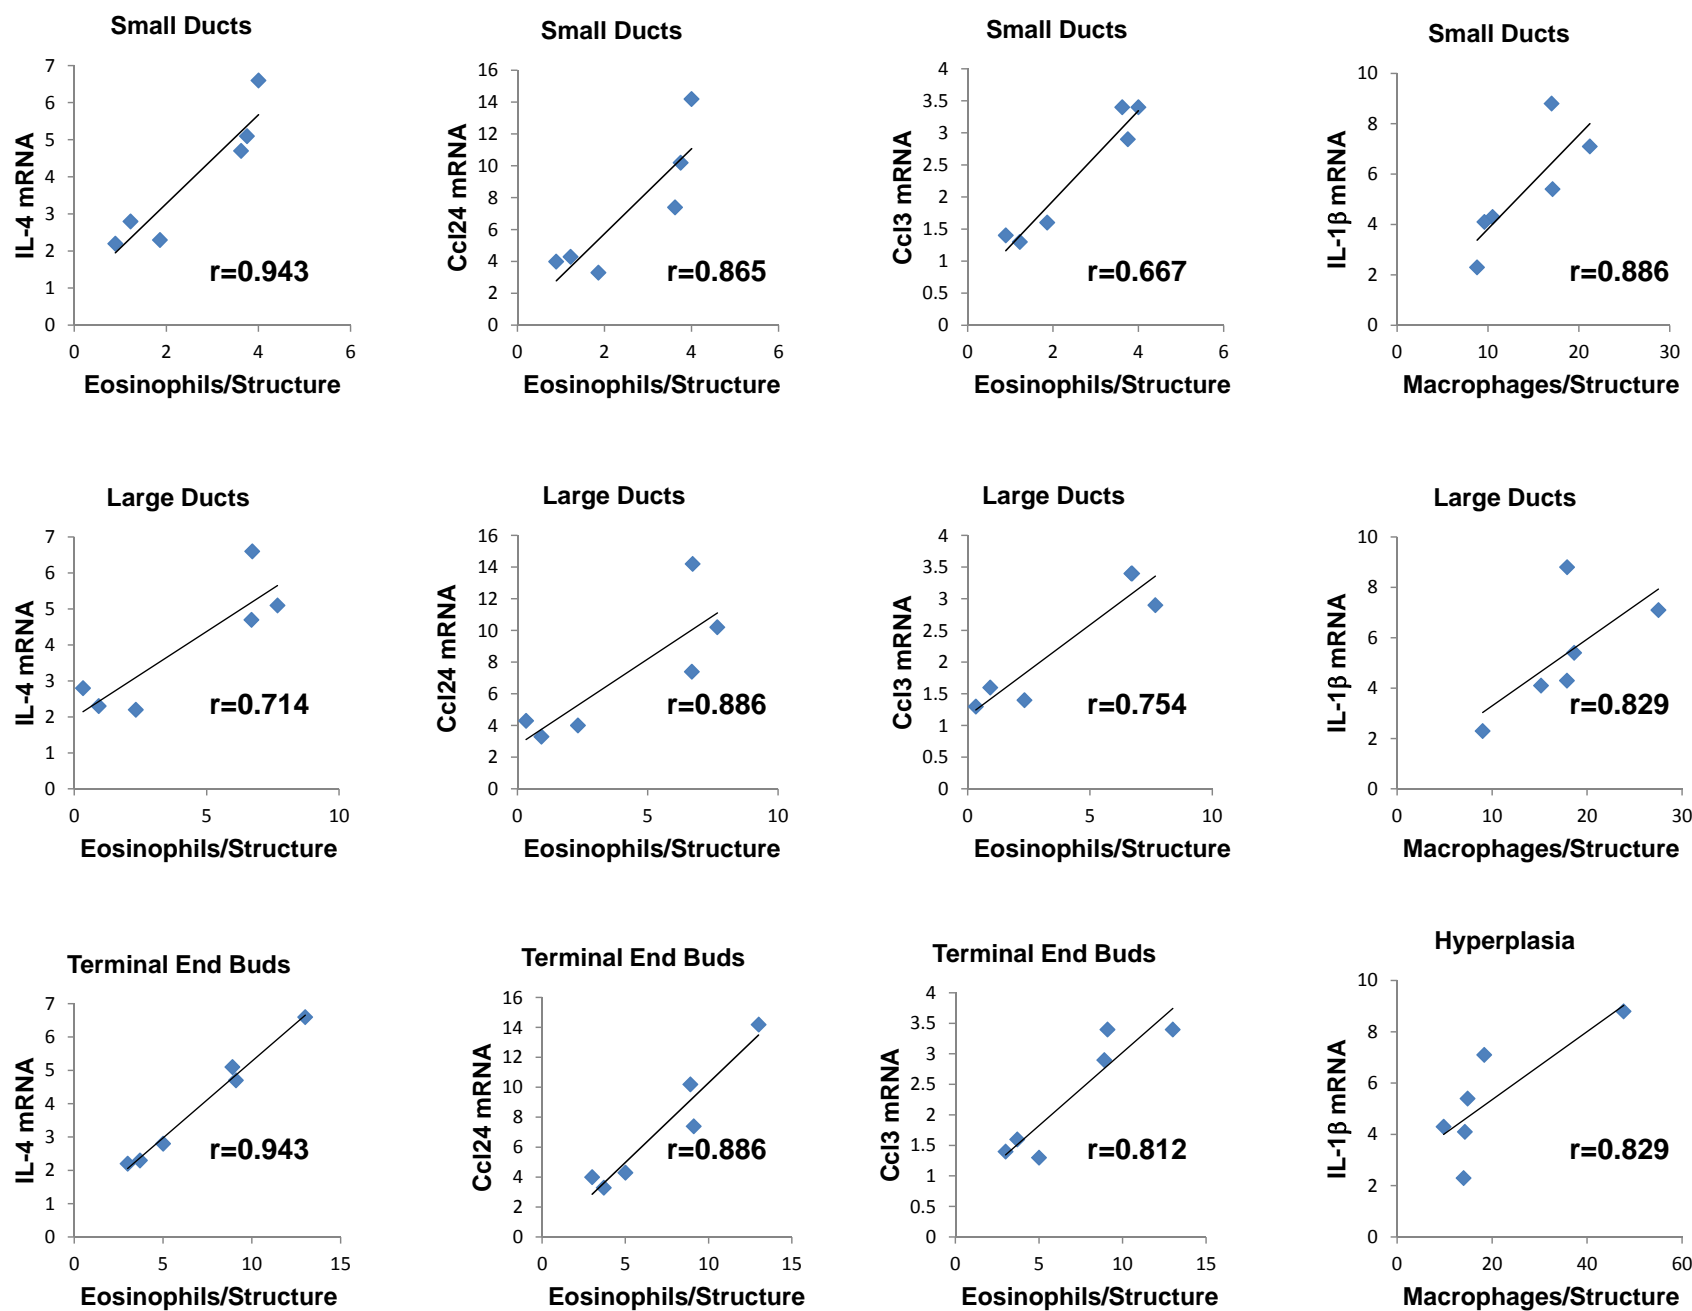

**Figure S5. Correlations between cytokine mRNA expression and leukocyte recruitment.** Ct values for the indicated mRNAs in individual animals were normalized to the average Ct values for *GusB*, *Hprt1*, *Hsp90ab1*, *Gapdh*, and *Actb* mRNAs in the same animals, and plotted against the indicated leukocyte counts in the same animals in association with the indicated individual structures. Correlations ( $r$ ) were calculated by Spearman's method.
